# Supplementary material for: Piezo1 reduces inflammation regulatory ability of periodontal ligament cells to decelerate orthodontic tooth movement in response to heavy mechanical force
Source: Research Square preprint supplement (doi:10.21203/rs.3.rs-3992346/v1), 2024-04-05
Supplement: Supplementary file 1 [file 2a08e499c2009d1c7664fda8.docx]

**Supporting Information**

**Piezo1 reduces inflammation regulatory ability of periodontal ligament cells to decelerate orthodontic tooth movement in response to heavy mechanical force**

Ye Zhu1, Xuehuan Meng1, Qiming Zhai1, Liangjing Xin1, Hao Tan1,Xinyi He1, Xiang Li1, Guoyin Yang1, **Jinlin Song 1*,** **Leilei Zheng1***

1 College of Stomatology, Chongqing Medical University, Chongqing Key Laboratory for Oral Diseases and Biomedical Sciences, Chongqing Municipal Key Laboratory of Oral Biomedical Engineering of Higher Education, Chongqing, China.

*Corresponding author. Email: [zhengleileicqmu@hospital.cqmu.edu.cn](mailto:zhengleileicqmu@hospital.cqmu.edu.cn) (Leilei Zheng), [Songjinlin@hospital.cqmu.edu.cn](mailto:Songjinlin@hospital.cqmu.edu.cn). (Jinlin Song)


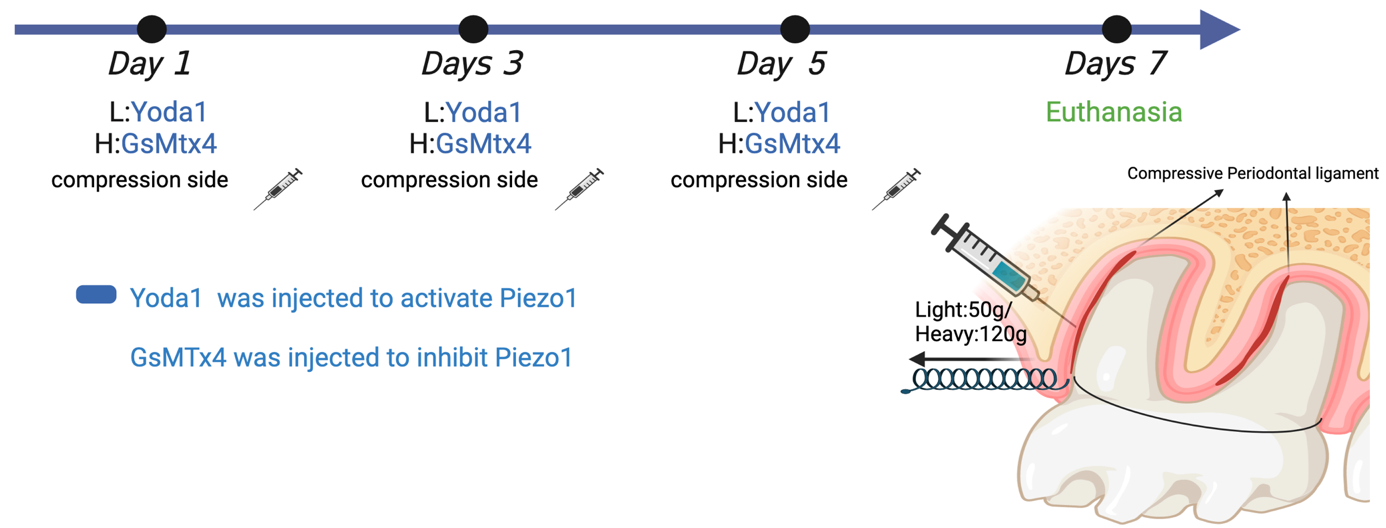


Fig S1. Schematic diagram of Piezo1 agonist and inhibitor intervention in OTM in Fig.4.


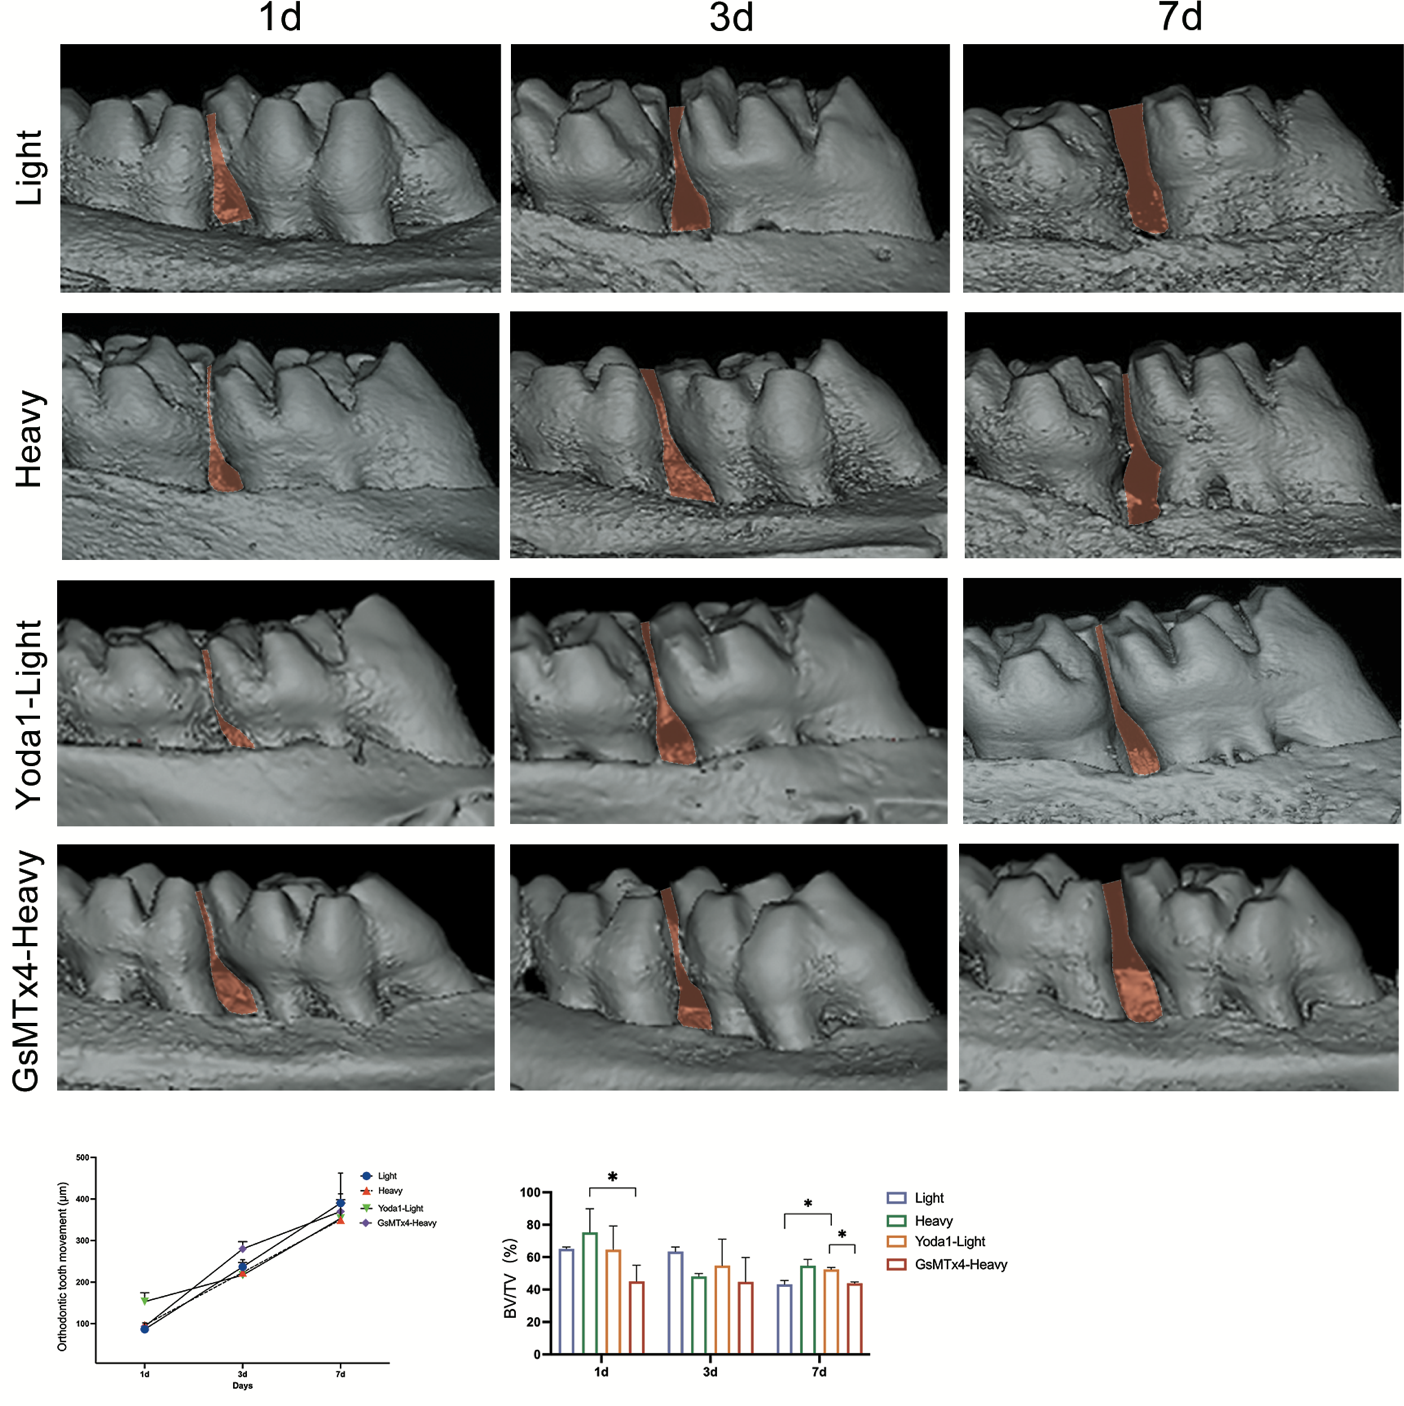


Figure S2. Micro-CT analysis of maxillary orthodontic tooth movement on days 1, 3, and 7 under the intervention of Piezo1 agonists and inhibitors in Fig.4 . N=3; Error bars, mean ± SD, * P<0.05, * * P<0.01.


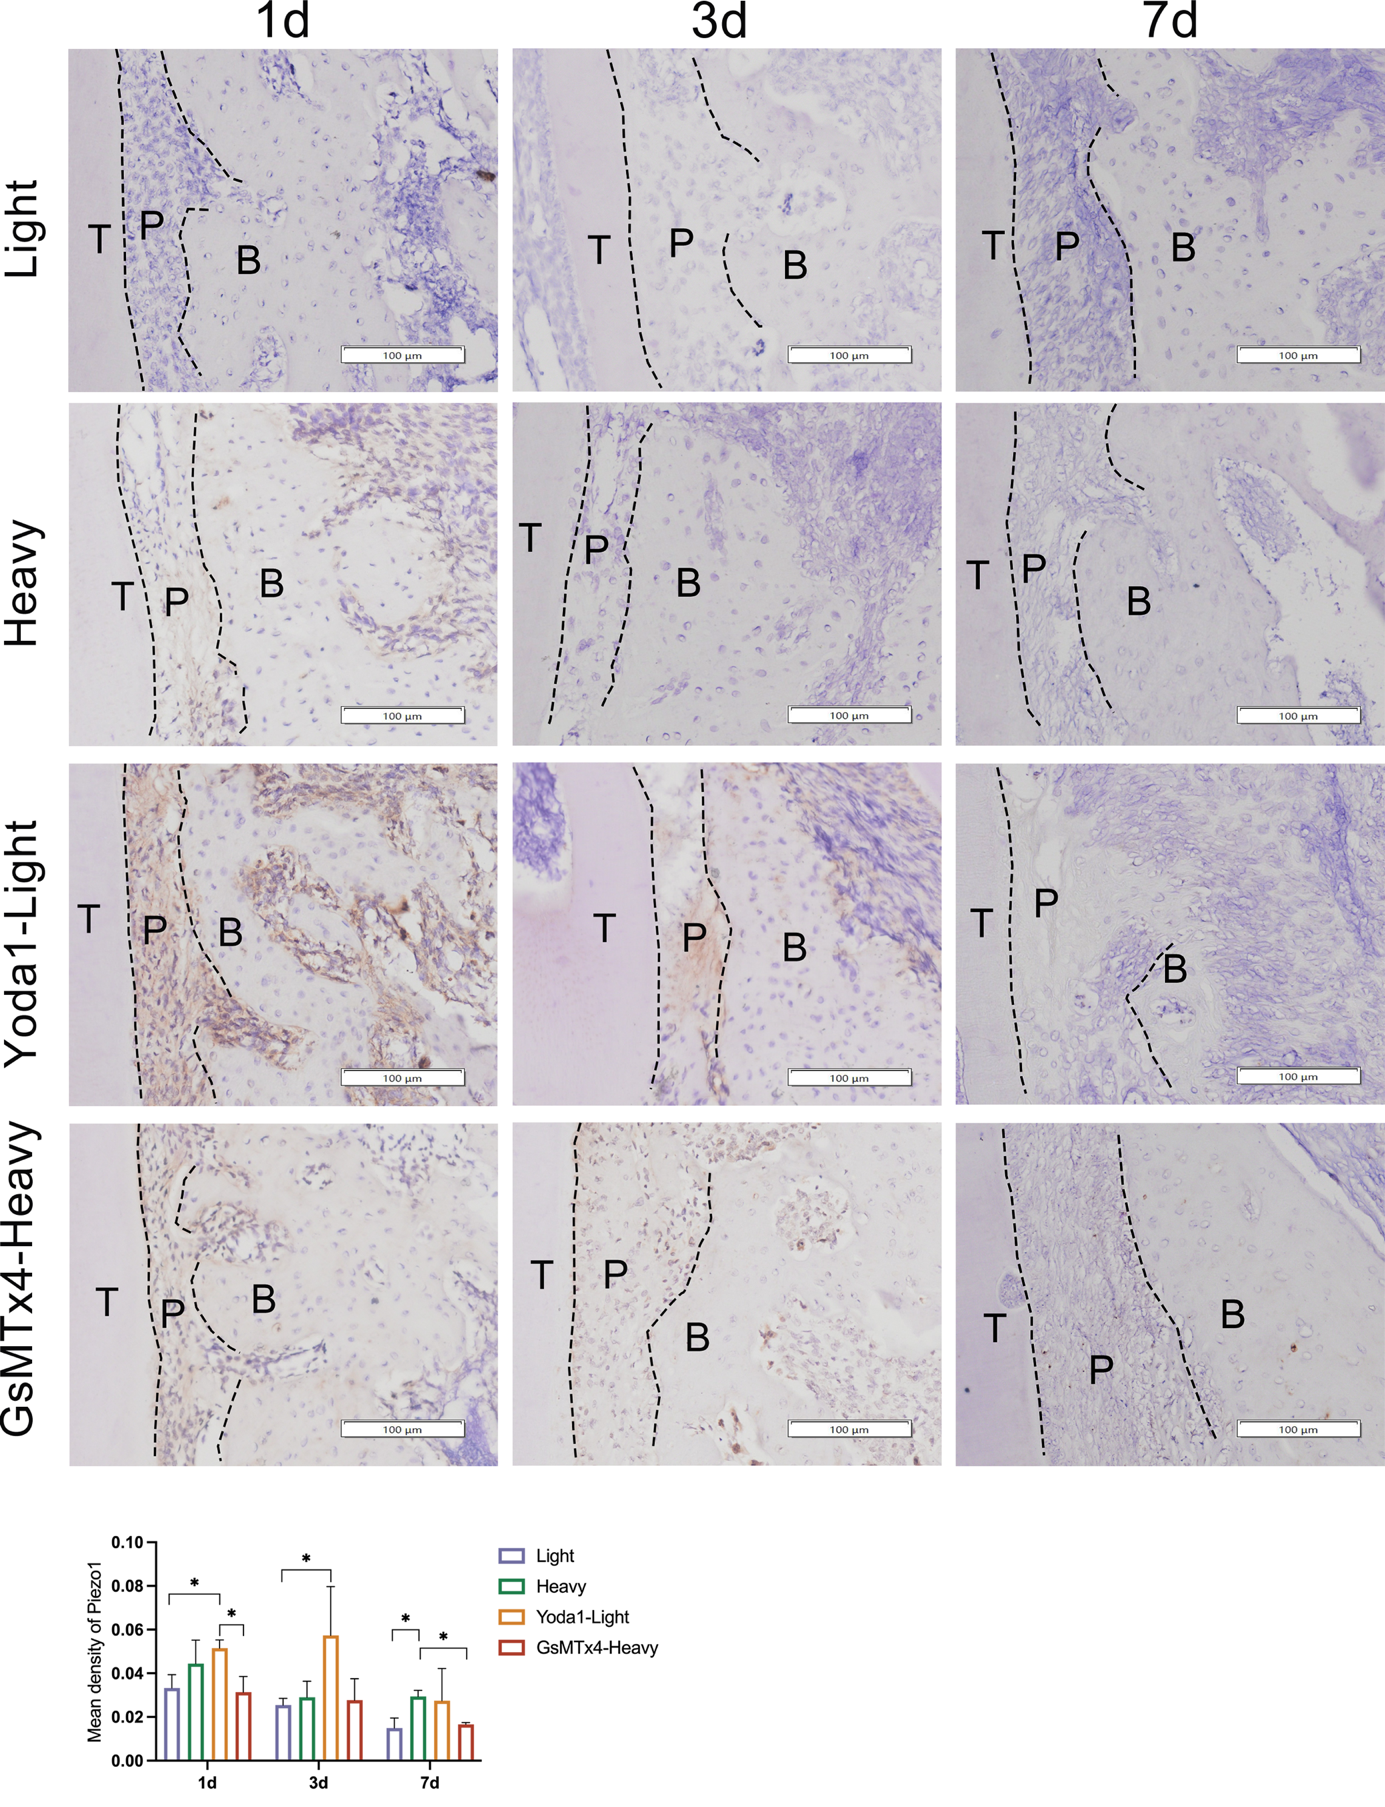


Figure S3. Immunofluorescence of Piezo1 in 1, 3 and 7 days (scale bar:100μm) in Fig.4. N=3; Error bars, mean ± SD, * P<0.05, * * P<0.01. T: tooth, P: PDL, B: bone.


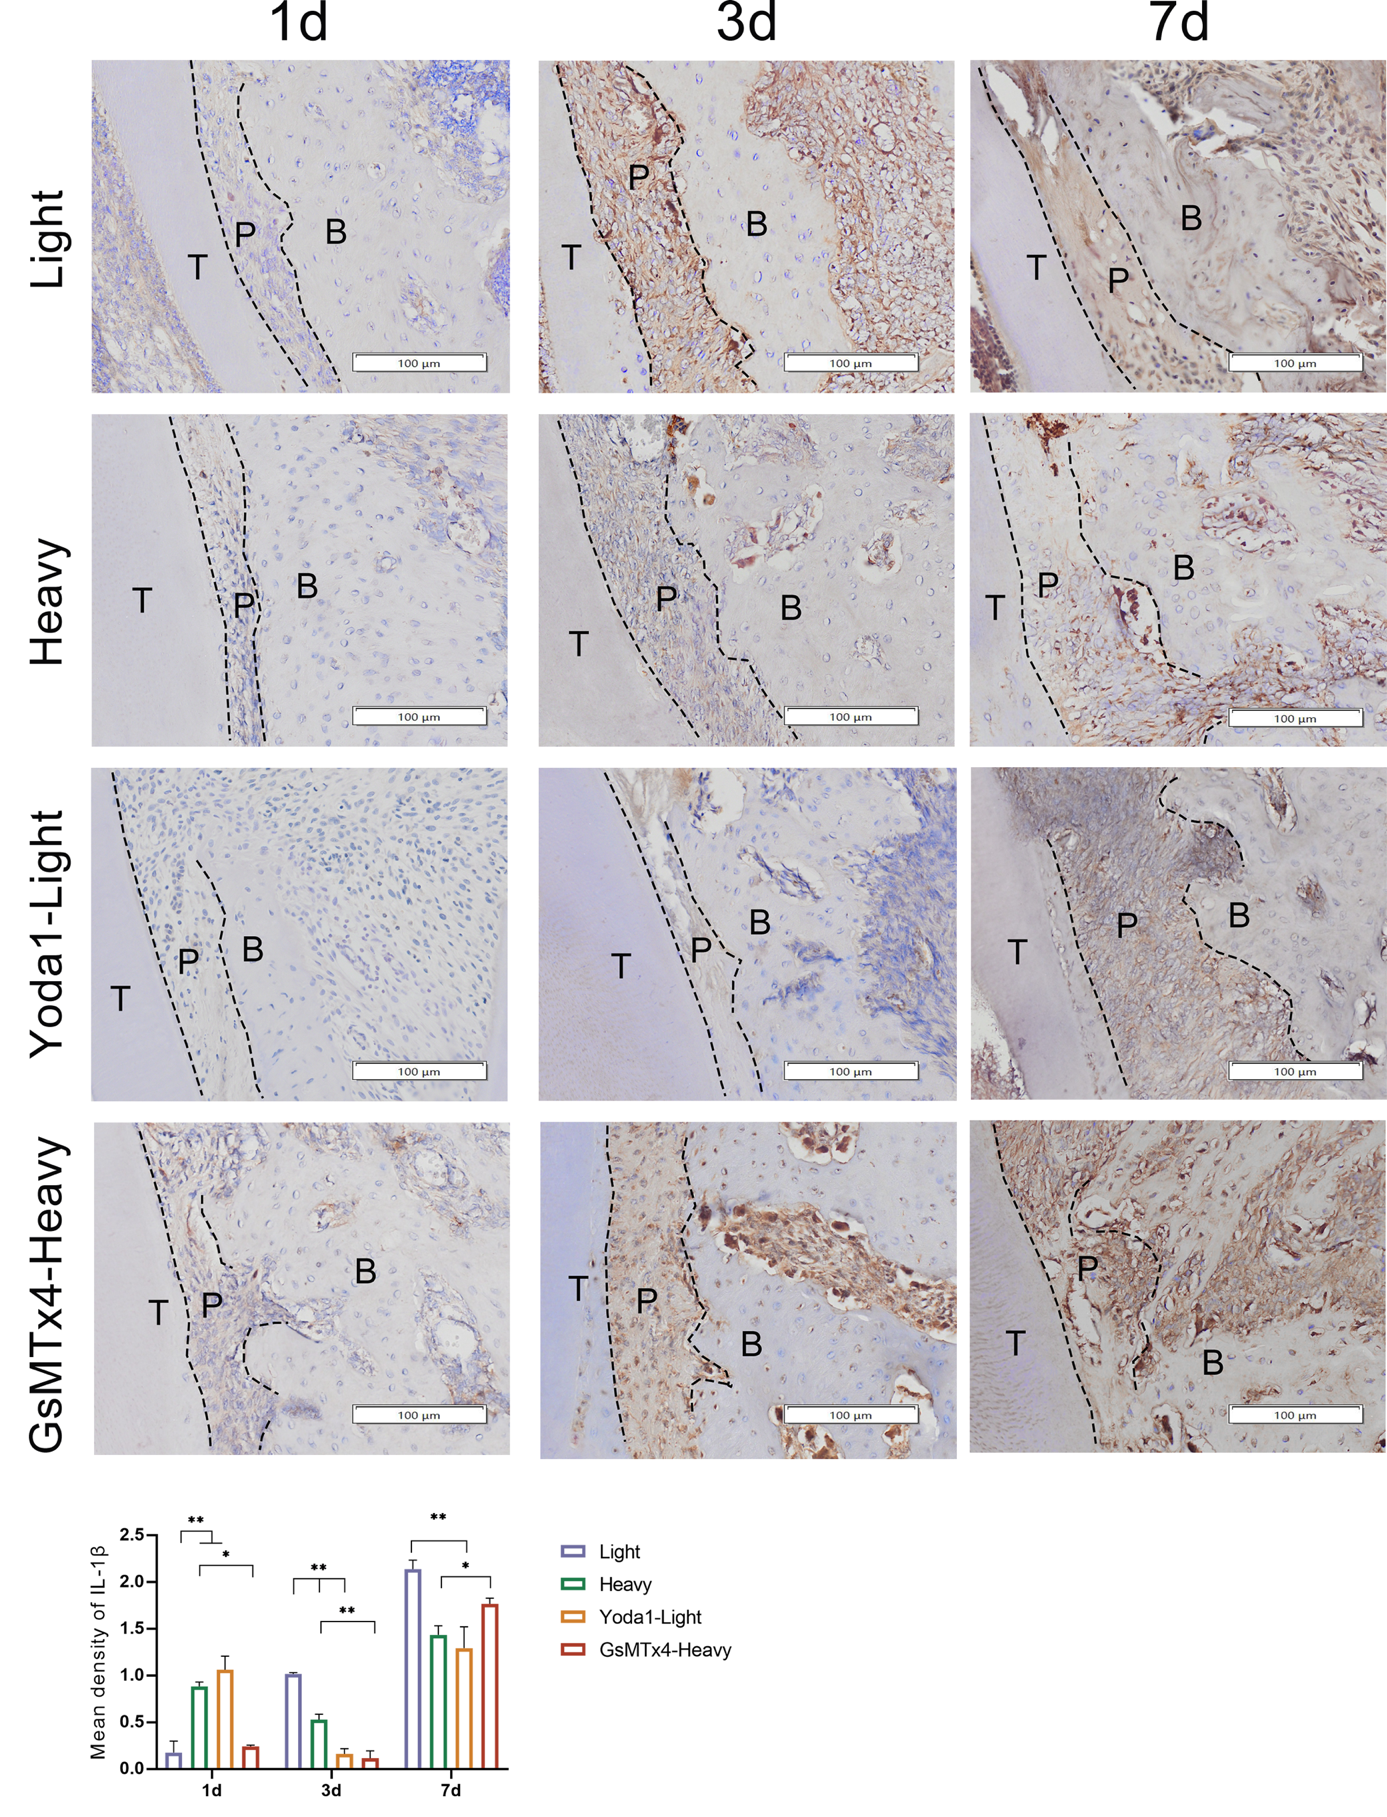


Figure S4. Immunofluorescence of IL-1β in 1, 3 and 7 days (scale bar:100μm) in Fig.4. N=3; Error bars, mean ± SD, * P<0.05, * * P<0.01.T: tooth, P: PDL, B: bone.


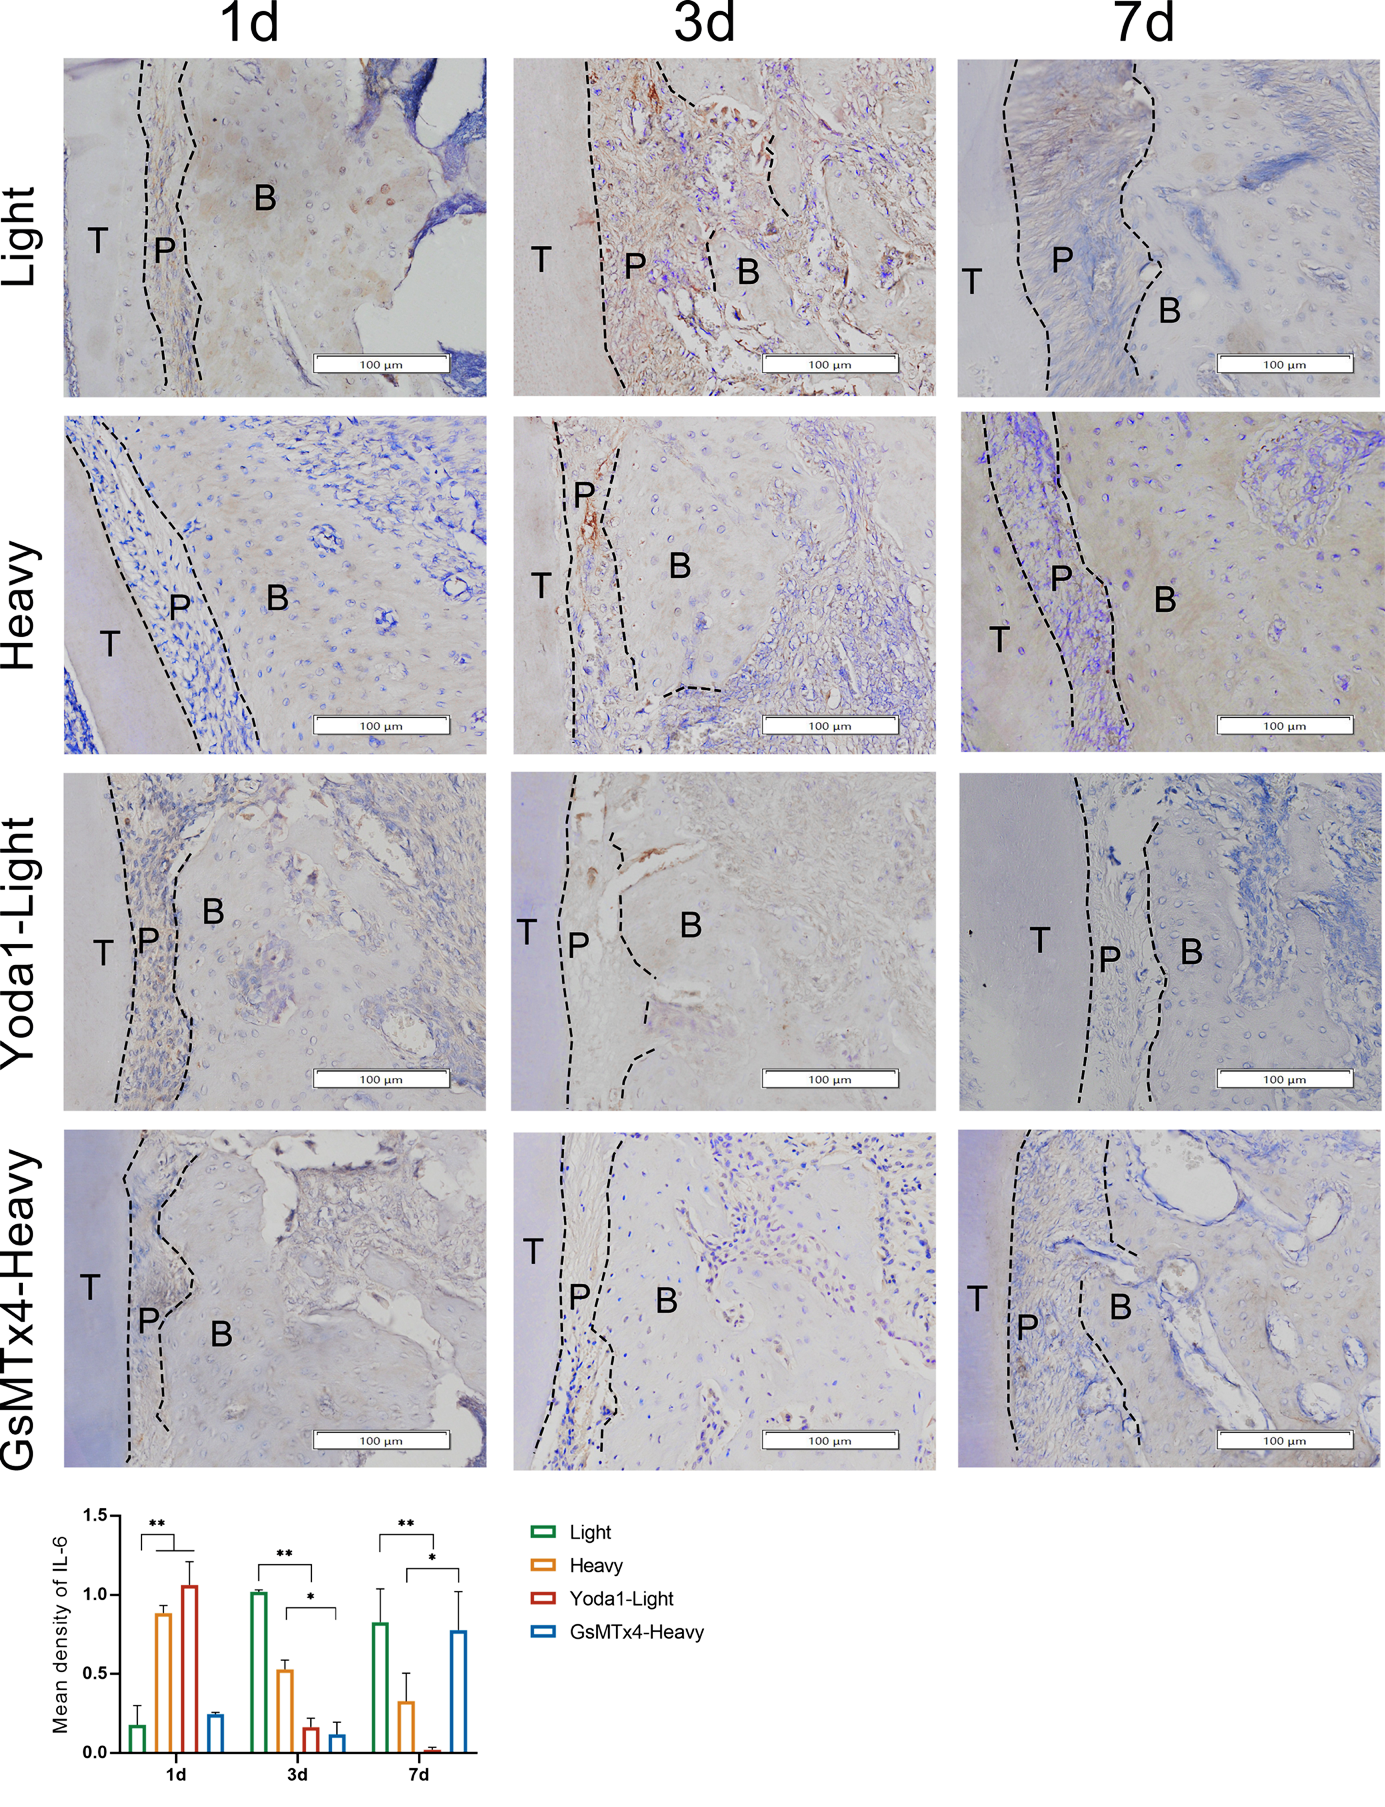


Figure S5. Immunofluorescence of IL-6 in 1, 3 and 7 days (scale bar:100μm) in Fig.4. N=3; Error bars, mean ± SD, * P<0.05, * * P<0.01.T: tooth, P: PDL, B: bone.


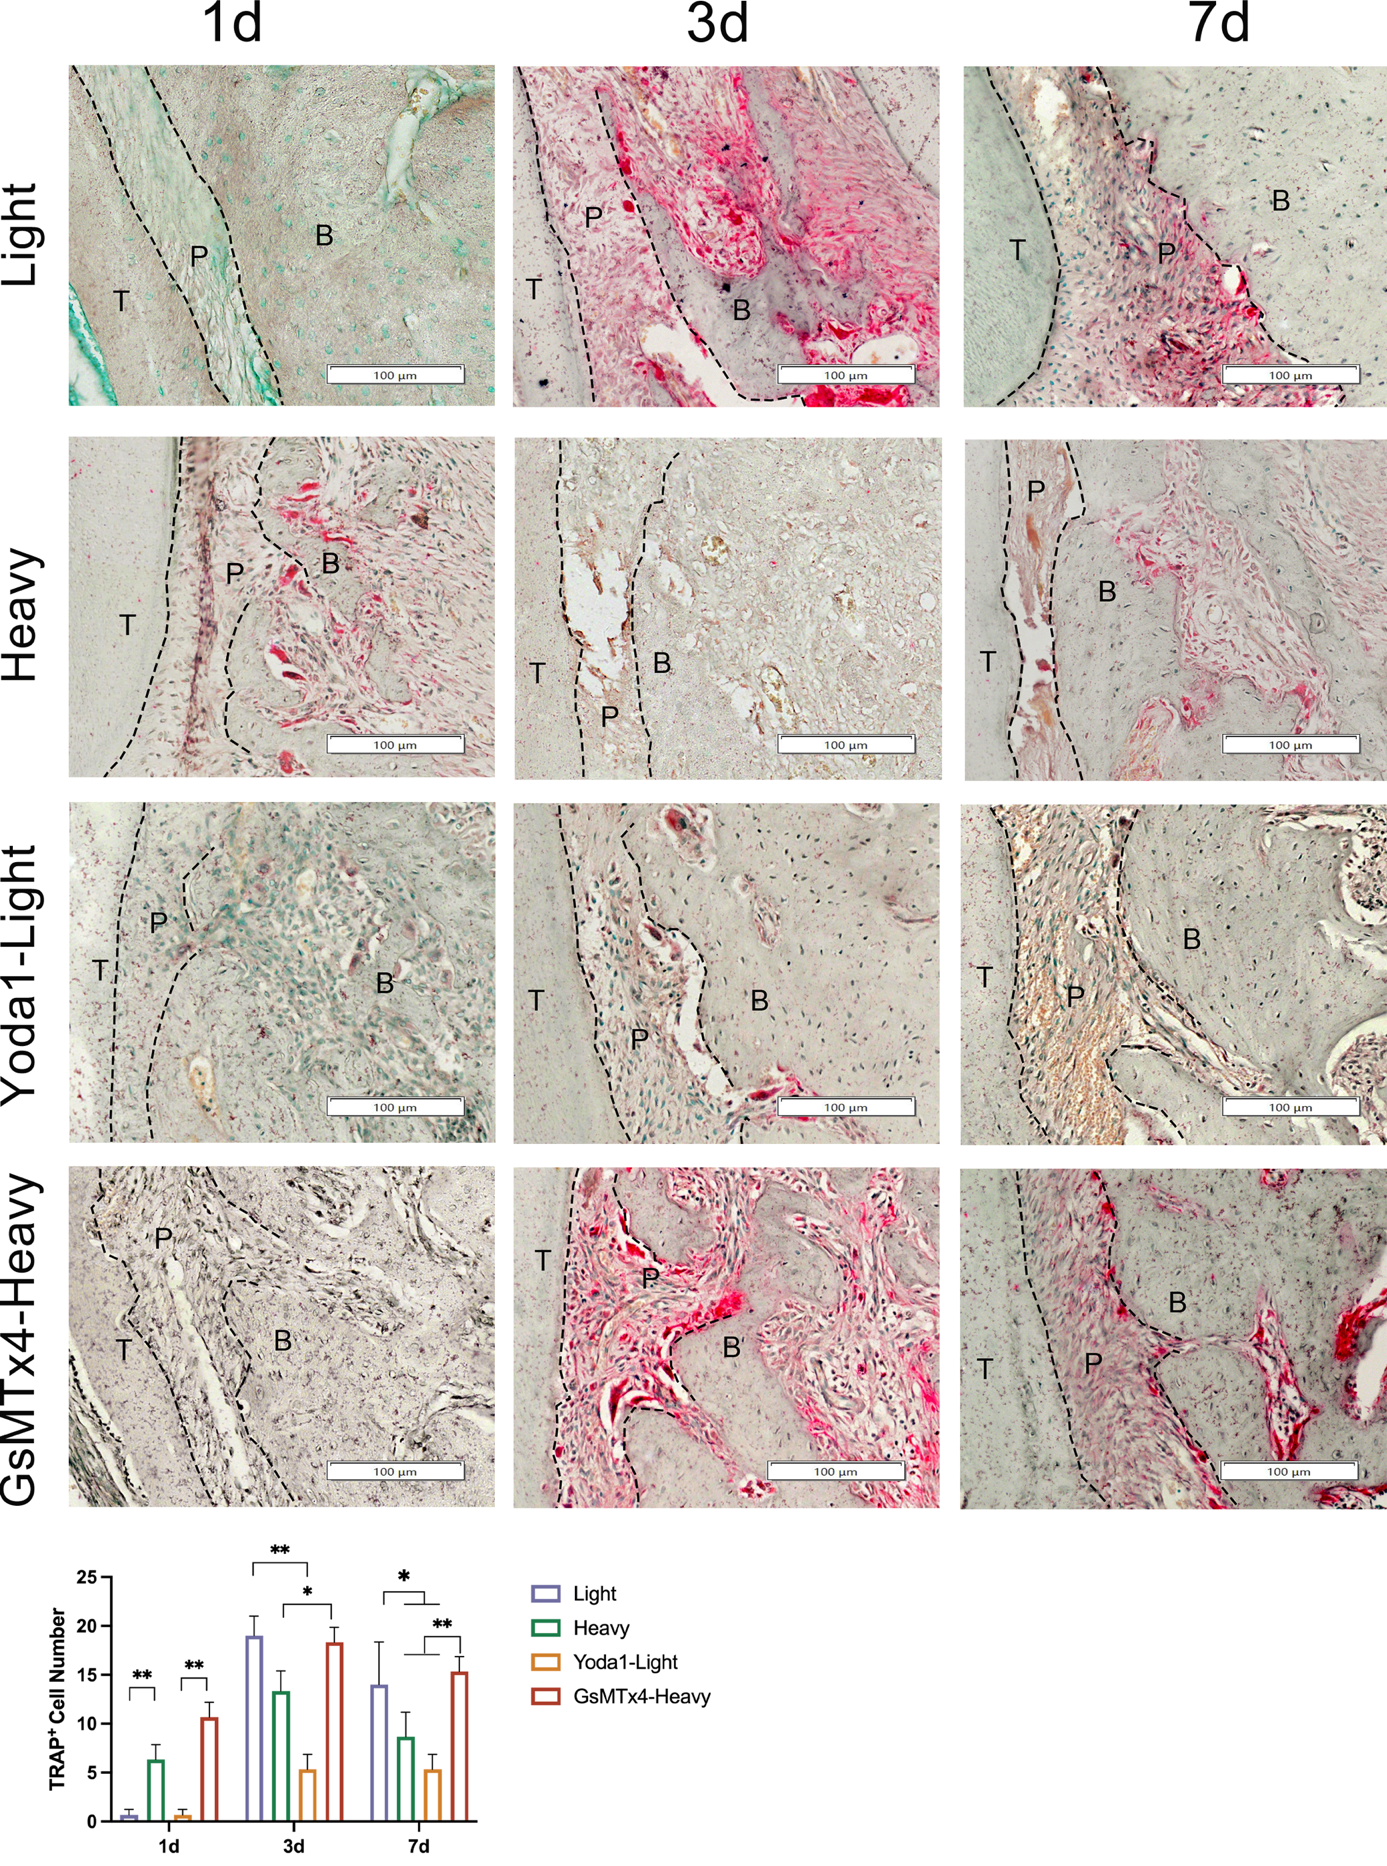


Figure S6. Tartrate-resistant acid phosphatase staining and analysis of maxillary orthodontic tooth movement on days 1, 3, and 7 under the intervention of Piezo1 agonists and inhibitors in Fig.4. N=3; Error bars, mean ± SD, * P<0.05, * * P<0.01.T: tooth, P: PDL, B: bone.

**
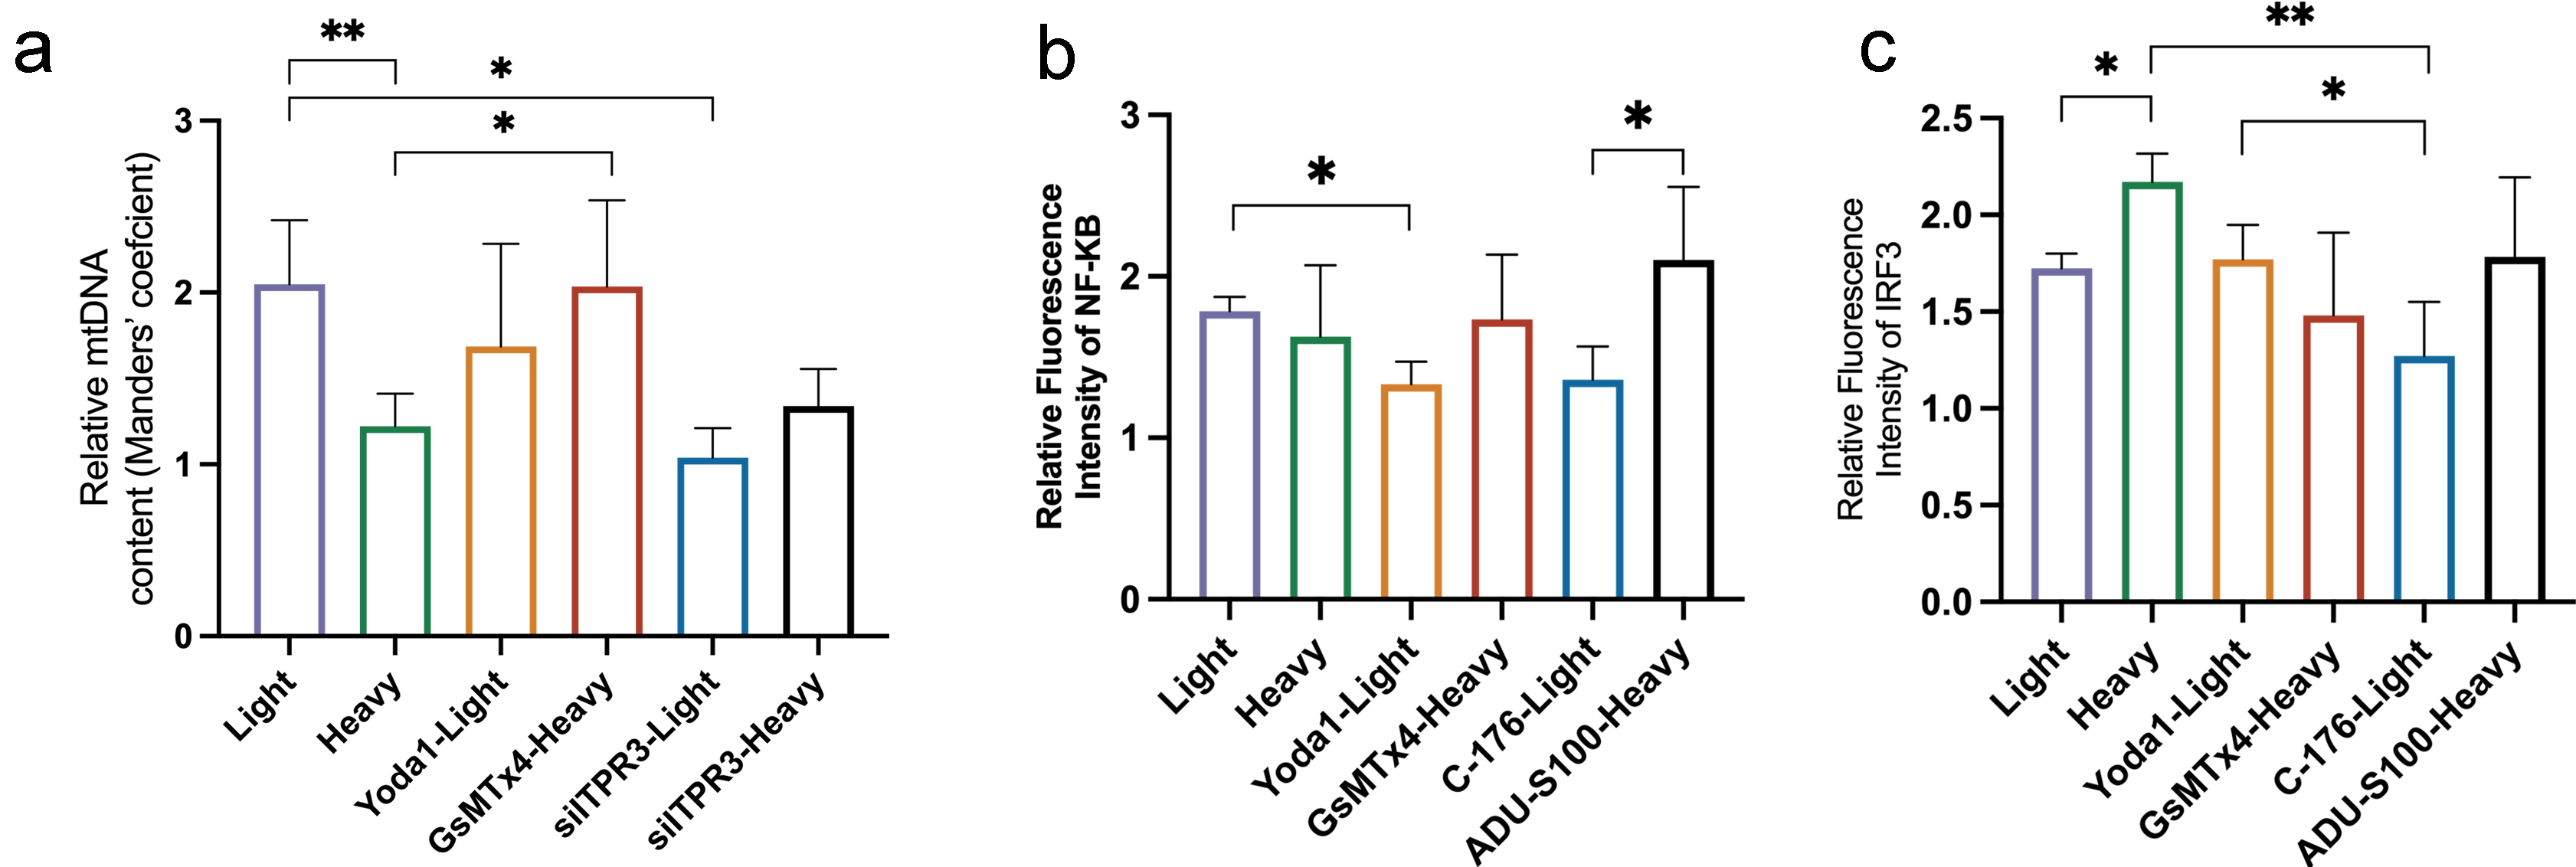
**

**Figure S7.** Immunofluorescence analysis of Fig.5. a. Immunofluorescence analysis of mtDNA. b. Immunofluorescence analysis of NF-κB. c. Immunofluorescence analysis of IRF3 in Fig.5. N=3; Error bars, mean ± SD, * P<0.05, * * P<0.01.


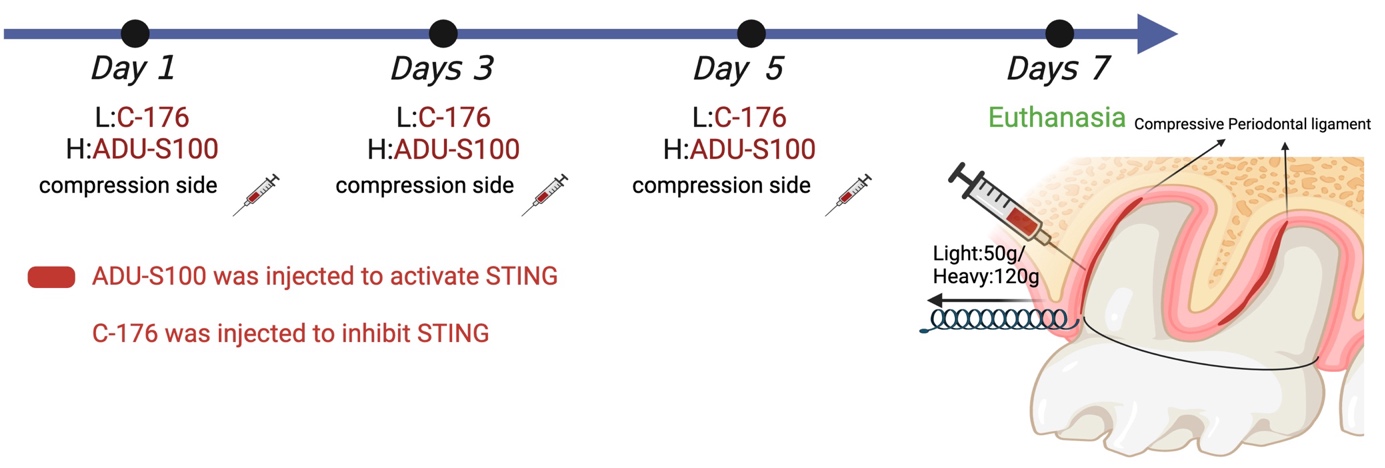


Figure S8. Schematic diagram of STING agonist and inhibitor intervention in OTM in Fig.6.


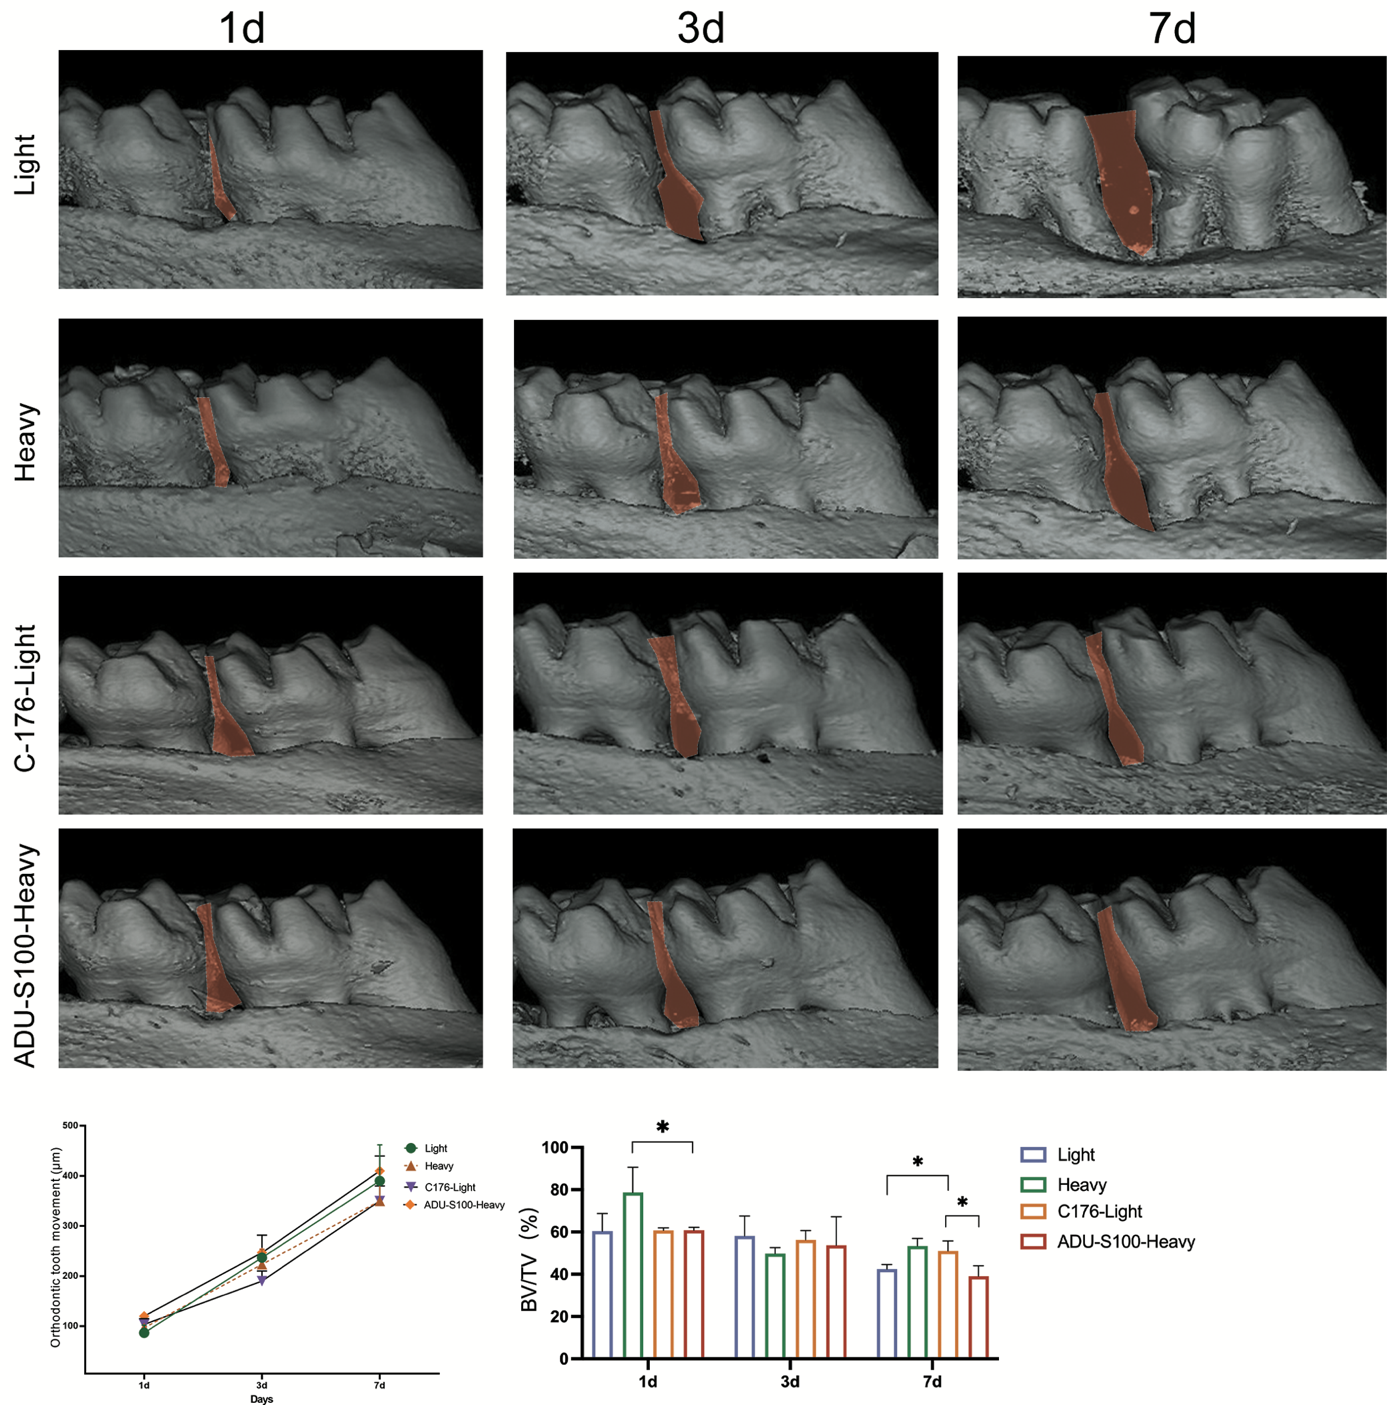


Figure S9. Micro-CT analysis of maxillary orthodontic tooth movement on days 1, 3, and 7 under the intervention of STING agonists and inhibitors in Fig.6. N=3; Error bars, mean ± SD, * P<0.05, * * P<0.01.


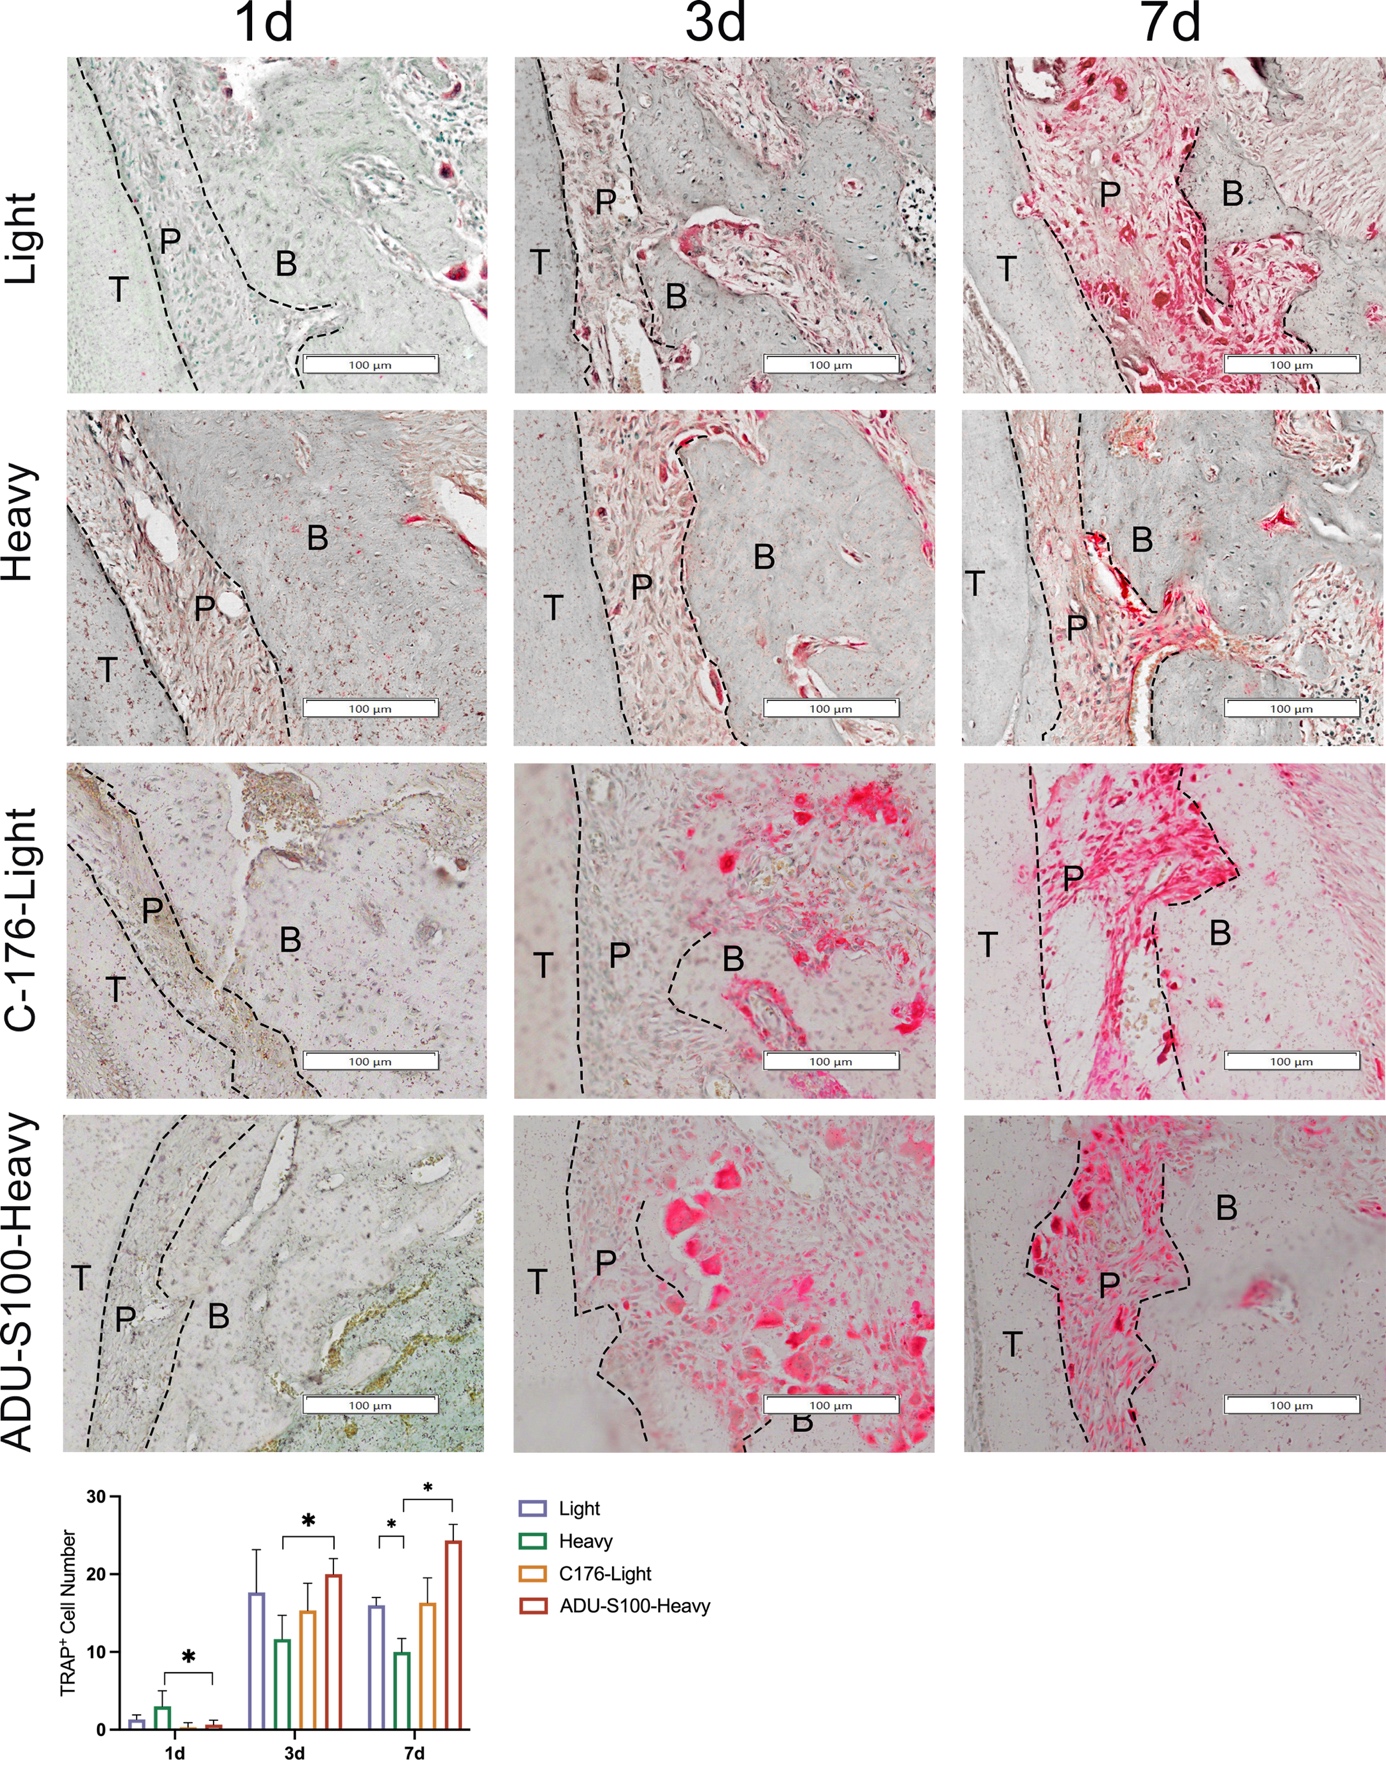


Figure S10. Tartrate-resistant acid phosphatase staining and analysis of maxillary orthodontic tooth movement on days 1, 3, and 7 under the intervention of STING agonists and inhibitors in Fig.6. N=3; Error bars, mean ± SD, * P<0.05, * * P<0.01.T: tooth, P: PDL, B: bone.


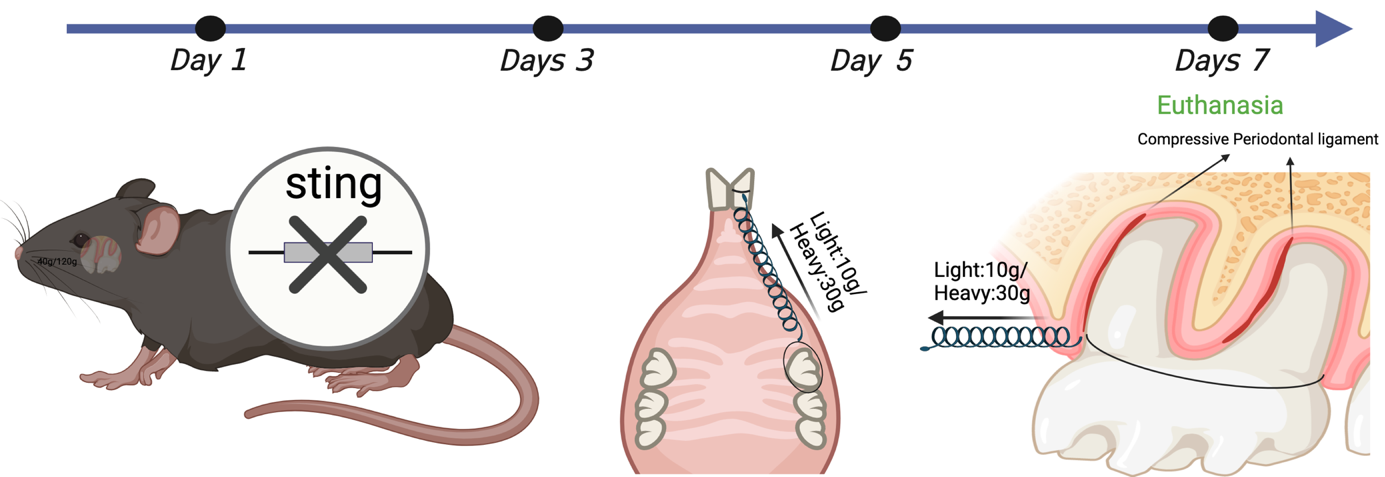


**Figure S11. Schematic diagram of WT and sting-/- mice in OTM in** **Fig.5**.

**
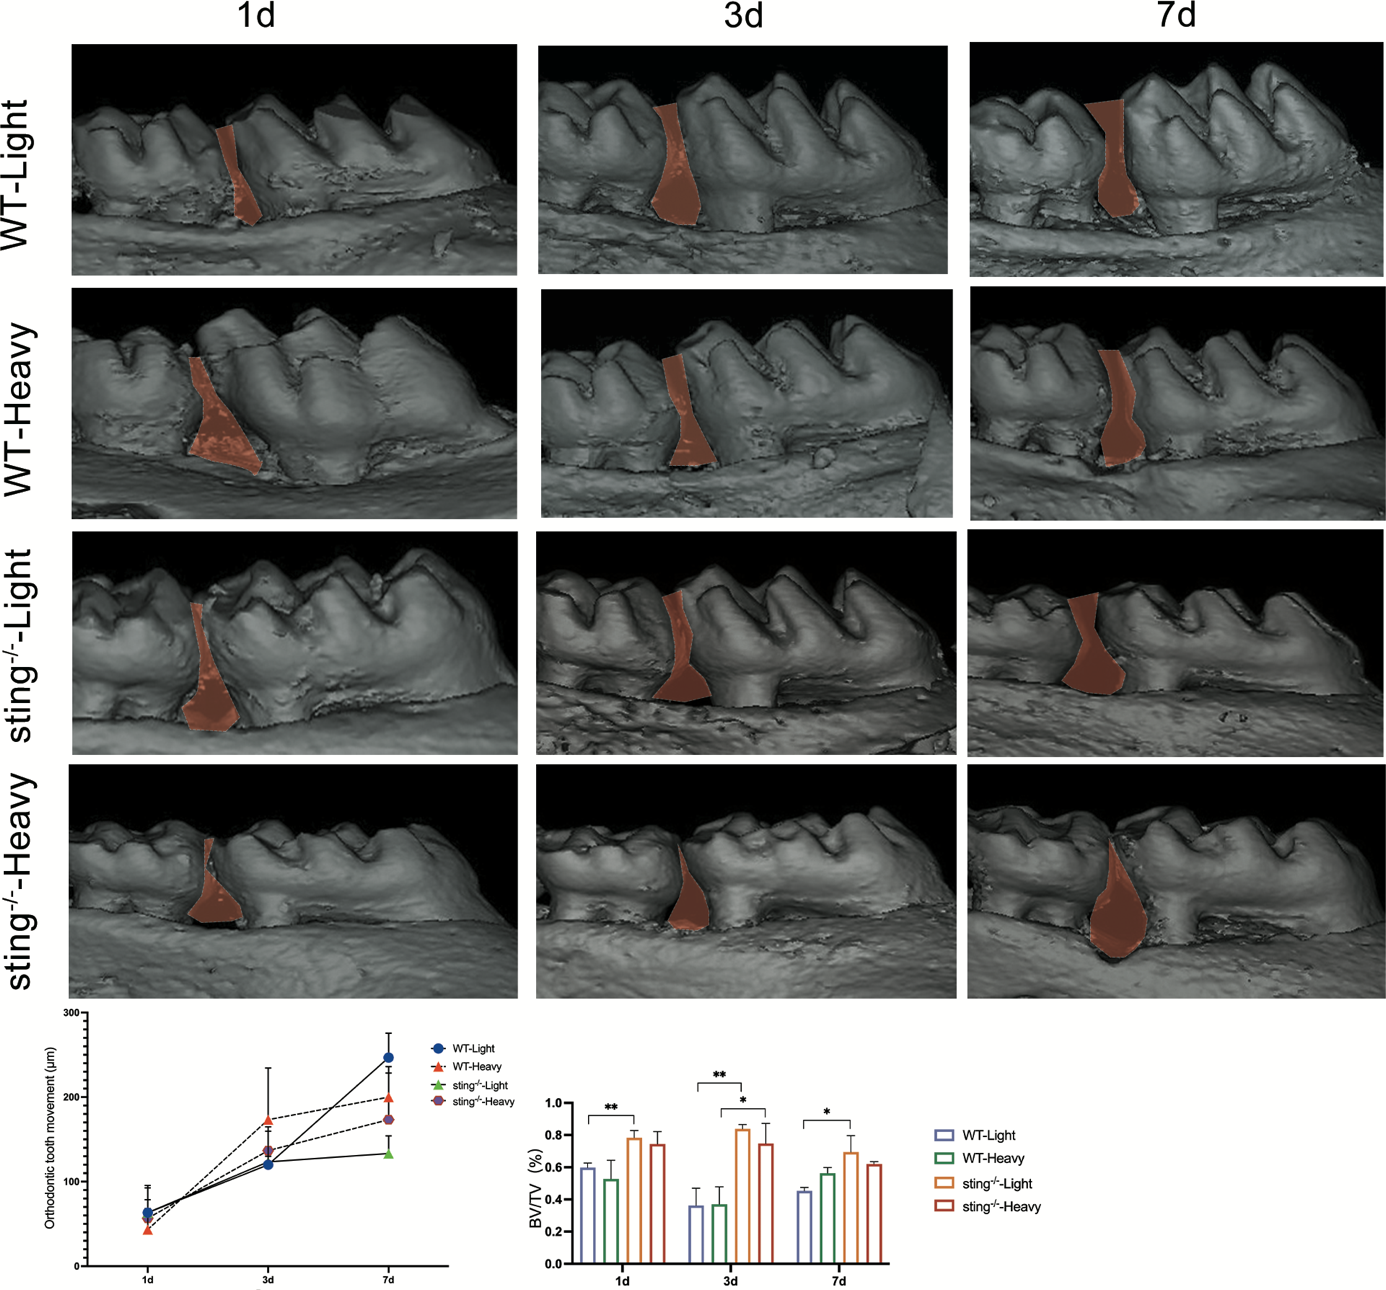
**

Figure S12. Micro-CT analysis of maxillary OTM in WT and sting-/- mice on days 1, 3, and 7 in Fig.6. N=3; Error bars, mean ± SD, * P<0.05, * * P<0.01.

**Supplementary Table 1.** List of reagents or resources used in the study.

| **REAGENT or RESOURCE** | **SOURCE** | **IDENTIFIER** |
| --- | --- | --- |
| **Antibodies** | | |
| Rabbit monoclonal anti – Piezo1 | Thermo Fisher Scientific | Cat# PA5-106296 |
| Rabbit monoclonal anti- alpha Tubulin | Abcam | Cat# ab176560 |
| Rabbit monoclonal anti - CDKN2A/p16INK4a | Abcam | Cat# ab270058 |
| Mouse monoclonal anti - IP3R-I/II/III | Santa Cruz | Cat# sc-377518 |
| Rabbit monoclonal anti - VDAC1 | Affinity | Cat# AF4012 |
| Mouse monoclonal anti - CBARA1/MICU1 | Santa Cruz | Cat# sc-518183 |
| Rabbit monoclonal anti - Hexokinase II | Abcam | Cat# ab209847 |
| Rabbit monoclonal anti - BAX | Abcam | Cat# ab32503 |
| Mouse monoclonal anti - dsDNA | Progen | Cat# 61014 |
| Rabbit monoclonal anti - TOMM20 | Abcam | Cat# ab186735 |
| Rabbit monoclonal anti - cGAS | Abcam | Cat# ab302617 |
| Rabbit monoclonal anti - STING | Abcam | Cat# ab288157 |
| Rabbit monoclonal anti - TBK1 | Abcam | Cat# ab40676 |
| Rabbit monoclonal anti - p-TBK1 | Abcam | Cat# ab109272 |
| Rabbit monoclonal anti -IRF3 | Abcam | Cat# ab68481 |
| Rabbit monoclonal anti - p-IRF3 | Abcam | Cat# ab76493 |
| Rabbit monoclonal anti - NF-κB | Abcam | Cat# ab16502 |
| Rabbit monoclonal anti - p-NF-κB | Abcam | Cat# ab109458 |
| Rabbit monoclonal anti - IL-1β | Abcam | Cat# ab315084 |
| Rabbit monoclonal anti - IL-6 | Abcam | Cat# ab9324 |

**Supplementary Table 2.** List of siRNAs used in the study.

| **Primer** | **Sequence (5'to3 ')** |
| --- | --- |
| ITPR3(human)siRNA-2836 | CCAACGAGGAGAAGAACAATT |
| UUGUUCUUCUCCUCGUUGGTT |
| ITPR3(human)siRNA-3709 | CGCCAAGGACAAGAAAGATT |
| UCUUUCUUGUCCUUGGCGGTT |
| ITPR3(human)siRNA-3583 | CGCAGGACGUGGAGAACUATT |
| UAGUUCUCCACGUCCUGCGTT |
| Negative control | UUCUCCGAACGUGUCACGUTT |
| ACGUGACACGUUCGGAGAATT |
| FAM negative control | UUCUCCGAACGUGUCACGUTT |
| ACGUGACACGUUCGGAGAATT |
| Positive control (human GAPDH) | GUAUGACAACAGCCUCAAGTT |
| CUUGAGGCUGUUGUCAUACTT |

**Supplementary Table 3.** List of primer used in the study

| **Primer** | **Sequence (5'to3 ')** |
| --- | --- |
| Piezo1 | TGTTCCAGTTTGGGTTCTTCC |
| ACAAGGTCAAACCCAAGAAGG |
| IL-1β | GAAATGATGGCTTATTACAGTGGC |
| TTGCTGTAGTGGTGGTCGGAG |
| IL-6 | GAGTAGTGAGGAACAAGCCAGAG |
| GGTCAGGGGTGGTTATTGC |
| MMP3 | CAATCCTACTGTTGCTGTGCG |
| CAAGGTTCATGCTGGTGTCC |
| MMP14 | GCCTGCGTCCATCAACACT |
| GCAGCATCAATCTTGTCGGT |
| CXCL3 | CCAAACCGAAGTCATAGCCAC |
| GGTGCTCCCCTTGTTCAGTATC |
| CXCL10 | TGACTCTAAGTGGCATTCAAGGA |
| TGGATTCAGACATCTCTTCTCACC |
| AREG | AGTGCTGATGGATTTGAGGTTAC |
| TAGCCAGGTATTTGTGGTTCG |
| EREG | GCCTGGGTTTCCATCTTCTAC |
| CACTTTGTTATTGACACTTGAGCC |
| CDKN2A(P16ink4a) | GGCACCAGAGGCAGTAACCA |
| AATCGGGGATGTCTGAGGGA |
| ITPR3 | GACCTCCTGTTCTTCTTCATCG |
| TGTCTTGTTATCAAACTTGTCCCTC |
| VDAC1 | TGACGGGCAGTCTGGAAAC |
| ATCTCGGTGCCTAGTGTATTGTC |
| MICU1 | TGGCGAACTGAGCAATAAGG |
| GCATGAGGCGAGTGAAACC |
| BAX | CCTCCTCTCCTACTTTGGGAC |
| GAAAAACACAGTCCAAGGCAG |
| ACTB | AGAAAATCTGGCACCACACCT |
| GATAGCACAGCCTGGATAGCA |
| 18sRNA | GGACACGGACAGGATTGACAG |
| CCAGAGTCTCGTTCGTTATCGG |
| MT-COL1 | ACTAACAGACCGCAACCTCAAC |
| TCCGAAGCCTGGTAGGATAAG |
| MT-ND1 | CACCCTCACCACTACAATCTTCC |
| GGTGTATGAGTTGGTCGTAGCG |
| MT-ND2 | AACCCGTCATCTACTCTACCATC |
| GTTGCTTGCGTGAGGAAATAC |
| cGAS | CGTATGTACCCAGAACCCTCA |
| TGTCACGCAGTTATCAAAGCAG |
| STING | TGATAACCTGAGTATGGCTGACC |
| TGATAACCTGAGTATGGCTGACC |
| TBK1 | TCTCAGGGAACAATAGAAACCAG |
| GGATGAGTGCCTTCTTGATGTG |
| IRF3 | GGCTCGTGATGGTCAAGGT |
| CTTGTACTGGTCGGAGGTGAG |
| NFKB-RELA | TGGGGACTACGACCTGAATG |
| AAGATGGGATGAGAAAGGACAG |
